# Supplementary material
Source: Springer Nature journal article supplement (https://www.springermedizin.de/resource/supplementary/12879_2012_2251_MOESM2_ESM.pdf/9443770)

A

Sensitivity

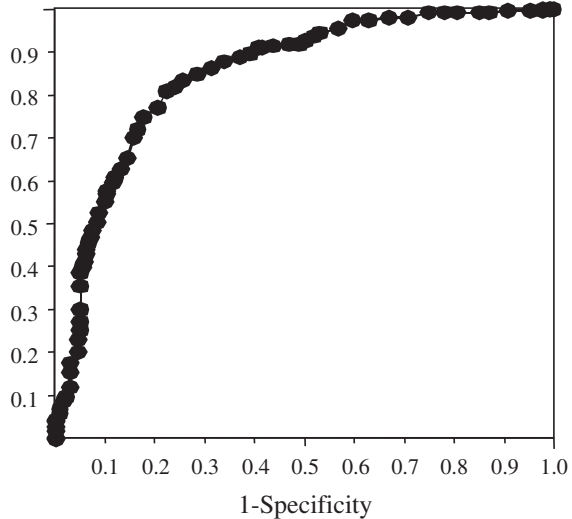

B

Sensitivity

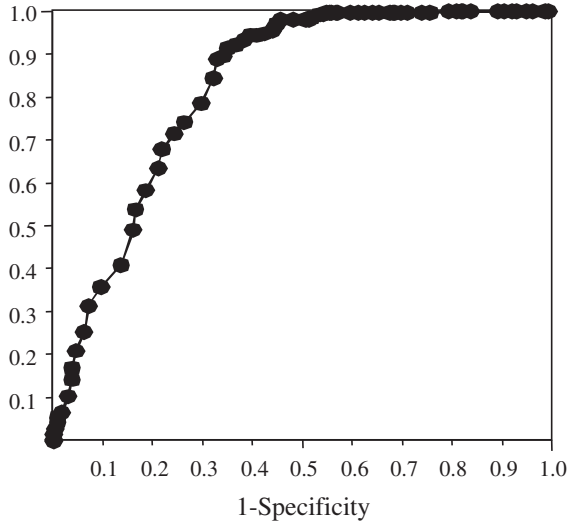

Supplement: MOESM2 [file 9443770]
